# Supplementary material for: Oxygen vacancy-triggered performance enhancement of toluene oxidation over Cu catalysts: a combined kinetics and mechanistic investigation
Source: Royal Society of Chemistry journal article supplement (doi:10.1039/d4ta02283a), 2024-01-01
Supplement: d4ta02283a1.pdf [file d4ta02283a1.pdf]

## Supplementary Materials

### **Oxygen Vacancy-Triggered Performance Enhancement of Toluene Oxidation over Cu Catalysts: A Combined Kinetics and Mechanistic Investigation**

Xiangxue Zhang,<sup>a</sup> Nina Fei,<sup>a</sup> Qianhong Wang,<sup>a</sup> Ali Raza Khan,<sup>a</sup> Wen Yao  
Chen,<sup>\*a</sup> Gang Qian,<sup>a</sup> Jing Zhang,<sup>a</sup> De Chen,<sup>b</sup> Xuezhi Duan,<sup>a</sup> Xinggui  
Zhou,<sup>a</sup> and Weikang Yuan<sup>a</sup>

<sup>a</sup> State Key Laboratory of Chemical Engineering, East China University  
of Science and Technology, 130 Meilong Road, Shanghai 200237, China.

<sup>b</sup> Department of Chemical Engineering, Norwegian University of Science  
and Technology, Trondheim 7491, Norway.

\* Corresponding Author: [wenyao.chen@ecust.edu.cn](mailto:wenyao.chen@ecust.edu.cn).

## Supporting Tables

**Table S1.** Structural parameters of Cu foil, Cu/ZrO<sub>2</sub>, Cu/ZnO, and Cu/Al<sub>2</sub>O<sub>3</sub> catalysts from the EXAFS fitting.

| Catalysts                          | Shell | CN <sup>a</sup> | R (Å) <sup>b</sup> | $\sigma^2$ (Å <sup>2</sup> ) <sup>c</sup> | $\Delta E_0$ (eV) <sup>d</sup> | R factor <sup>e</sup> |
|------------------------------------|-------|-----------------|--------------------|-------------------------------------------|--------------------------------|-----------------------|
| Cu foil                            | Cu-Cu | 12              | 2.54±0.01          | 0.008±0.001                               | 4.7±0.7                        | 0.012                 |
| Cu/ZrO <sub>2</sub>                | Cu-O  | 3.9±0.5         | 1.96±0.01          | 0.005±0.002                               | -2.0±1.5                       | 0.015                 |
|                                    | Cu-Cu | 0.6±1.2         | 2.57±0.05          | 0.010±0.017                               |                                |                       |
| Cu/ZnO                             | Cu-O  | 0.8±0.6         | 1.84±0.04          | 0.002±0.011                               | 2.5±2.5                        | 0.008                 |
|                                    | Cu-Cu | 5.5±1.3         | 2.53±0.02          | 0.006±0.002                               |                                |                       |
| Cu/ Al <sub>2</sub> O <sub>3</sub> | Cu-O  | 2.4±0.4         | 1.96±0.02          | 0.001±0.003                               | -0.2±1.8                       | 0.020                 |

<sup>a</sup> CN: coordination numbers. <sup>b</sup> R: bond distance. <sup>c</sup>  $\sigma^2$ : Debye-Waller factors. <sup>d</sup>  $\Delta E_0$ : the inner potential correction. <sup>e</sup> R factor: goodness of fit.  $S_0^2$  was set to 0.864 for Cu, according to the experimental EXAFS fit of Cu foils reference by fixing CN as the known crystallographic value.

**Table S2.** Assignment of infrared bands appearing in the process of toluene oxidation over the Cu catalysts.

| Position (cm <sup>-1</sup> ) | Assignment                                                                                                 |
|------------------------------|------------------------------------------------------------------------------------------------------------|
| 3070, 3032                   | phenylic $\nu(\text{C-H})$ stretching vibration of benzene ring                                            |
| 2945, 2888                   | asymmetric and symmetric $\nu(\text{CH-})$ stretching vibrations of the methylene ( $\text{C-H}_2$ ) group |
| 1958, 1919, 1813, 1721, 1618 | asymmetric and symmetric $\nu(\text{C=O})$ stretching vibrations of cyclic anhydrides                      |
| 1597                         | skeletal $\nu(\text{C=C})$ stretching vibrations of the aromatic ring                                      |
| 1530                         | $\nu(\text{C=O})$ stretching vibrations of carboxylate group in benzoate species                           |
| 1451                         | $\nu(\text{C=O})$ stretching vibrations of benzaldehyde species                                            |
| 1418                         | $\nu(\text{C=O})$ stretching vibrations of carbonate species                                               |
| 1312                         | $\text{CH}_2$ deformation vibration of benzyl species                                                      |
| 1225                         | $\nu(\text{CO-})$ stretching vibrations of phenolate species                                               |
| 1071                         | $\nu(\text{CO-})$ stretching vibrations of alkoxide species                                                |

## Supporting Figures

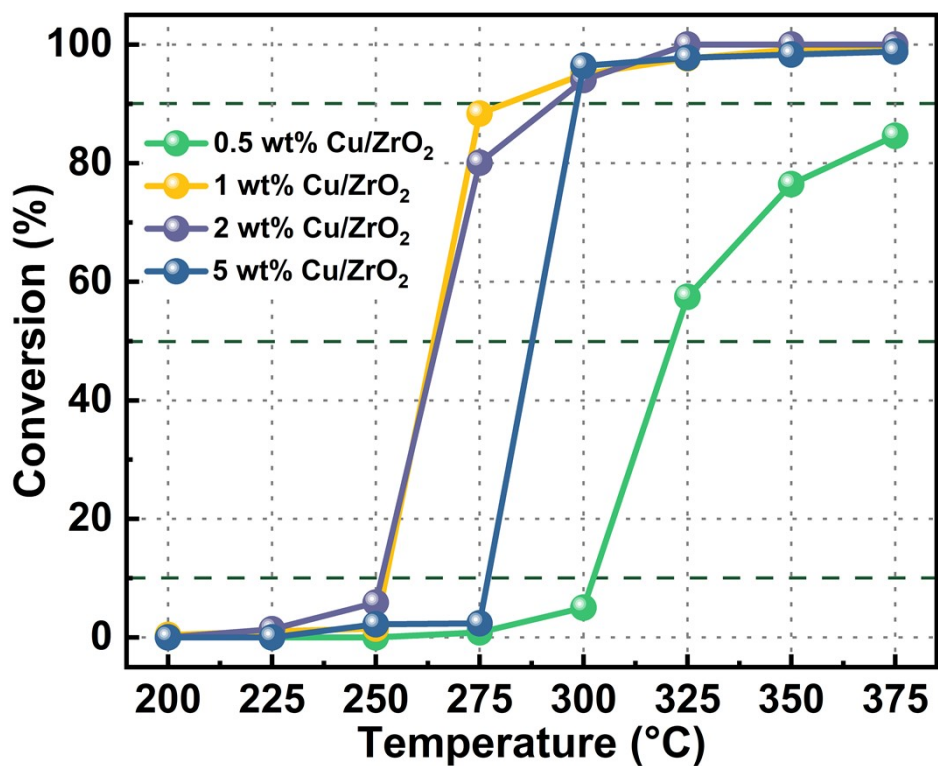

**Figure S1.** Toluene conversion as a function of reaction temperature over Cu/ZrO<sub>2</sub> catalysts with different Cu loadings.

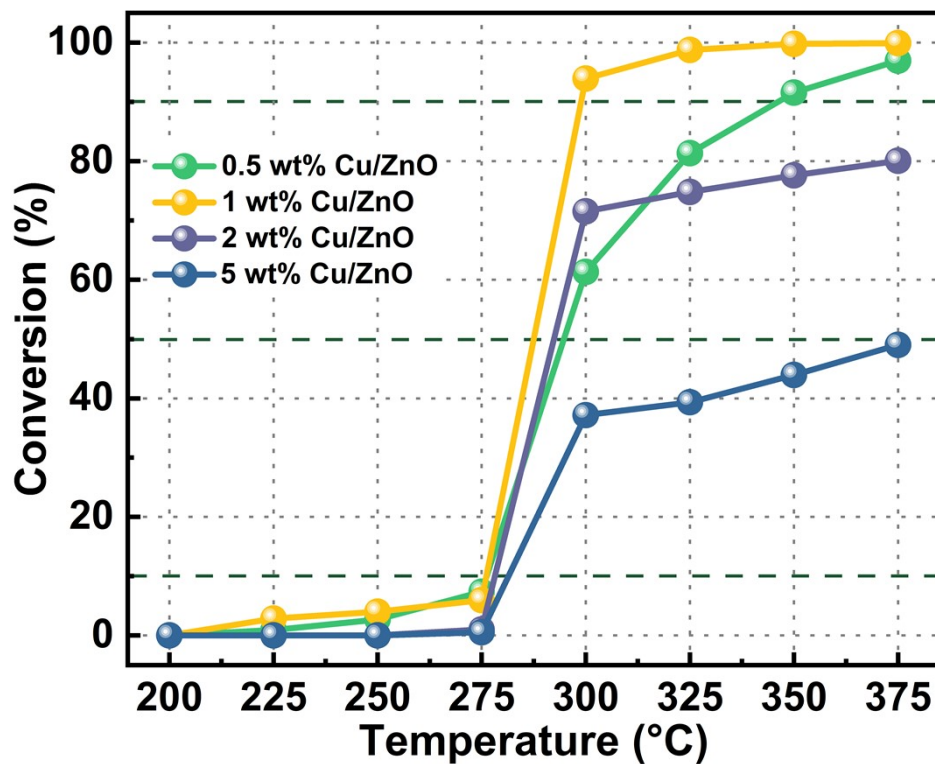

**Figure S2.** Toluene conversion as a function of reaction temperature over Cu/ZnO catalysts with different Cu loadings.

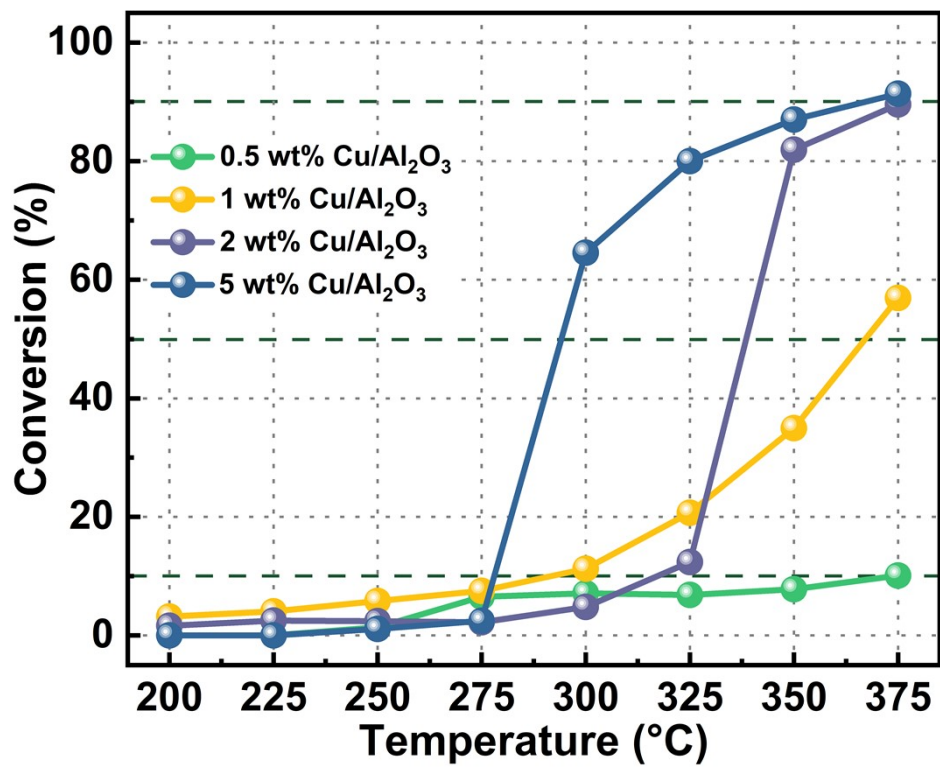

**Figure S3.** Toluene conversion as a function of reaction temperature over Cu/Al<sub>2</sub>O<sub>3</sub> catalysts with different Cu loadings.

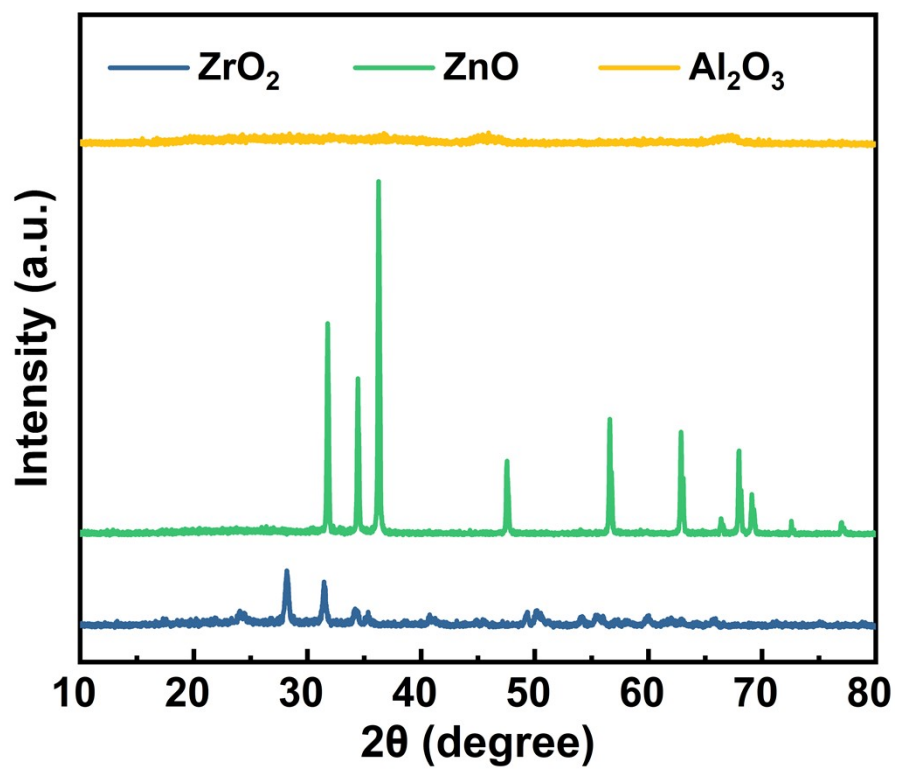

Figure S4. XRD patterns of the ZrO<sub>2</sub>, ZnO, and Al<sub>2</sub>O<sub>3</sub> supports.

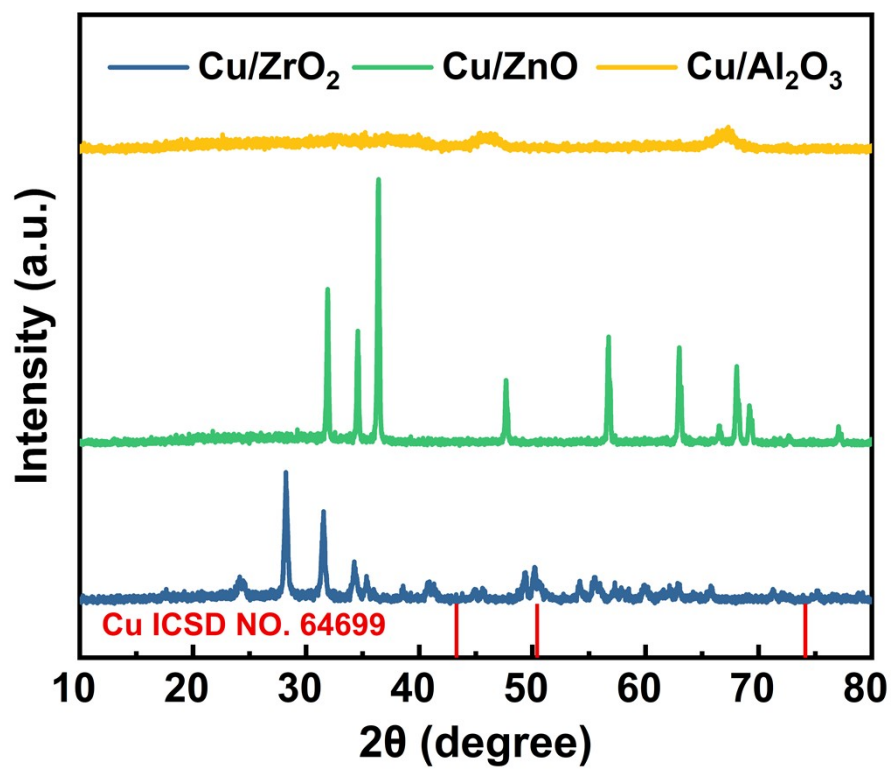

Figure S5. XRD patterns of the Cu/ZrO<sub>2</sub>, Cu/ZnO, and Cu/Al<sub>2</sub>O<sub>3</sub> catalysts.



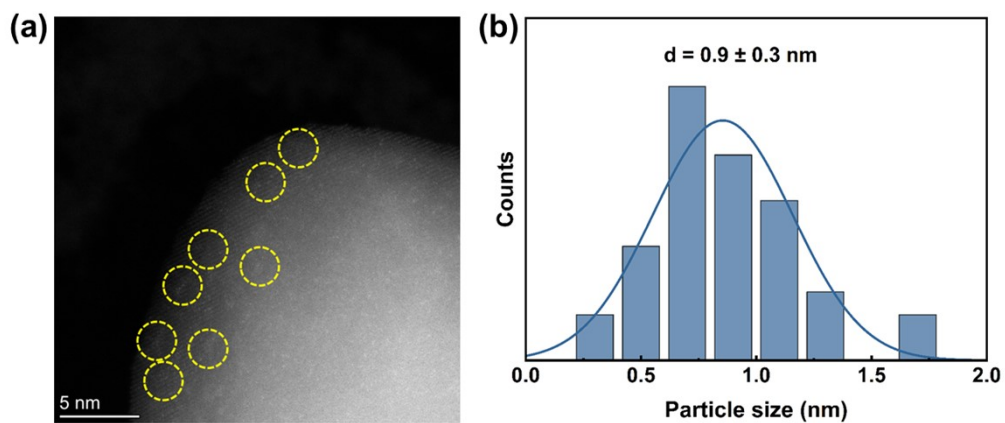

**Figure S6.** (a) HAADF-STEM images of the Cu/ZrO<sub>2</sub> catalyst and (b) the corresponding histogram of the particle size distributions.

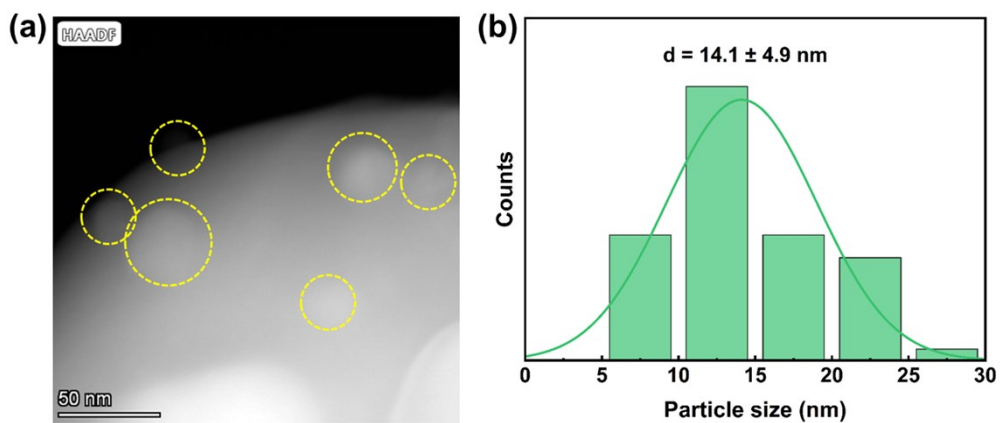

**Figure S7.** (a) HAADF-STEM images of the Cu/ZnO catalyst and (b) the corresponding histogram of the particle size distributions.

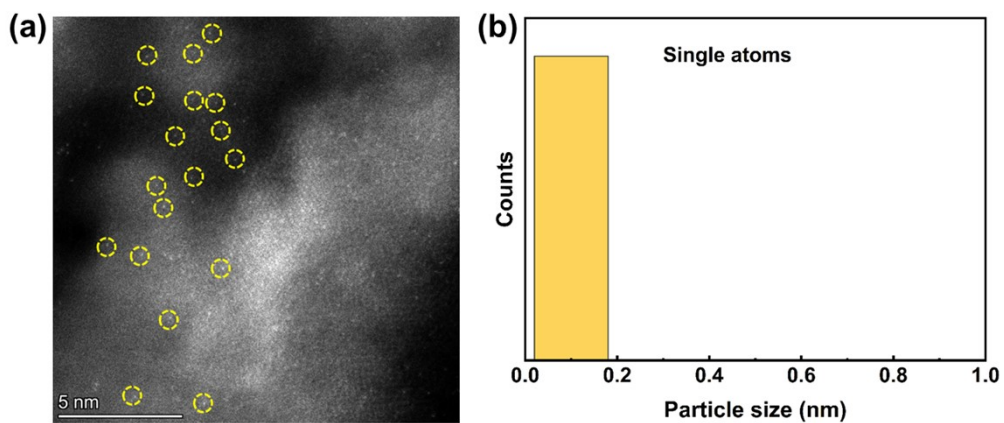

**Figure S8.** (a) HAADF-STEM images of the Cu/Al<sub>2</sub>O<sub>3</sub> catalyst and (b) the corresponding histogram of the particle size distributions.

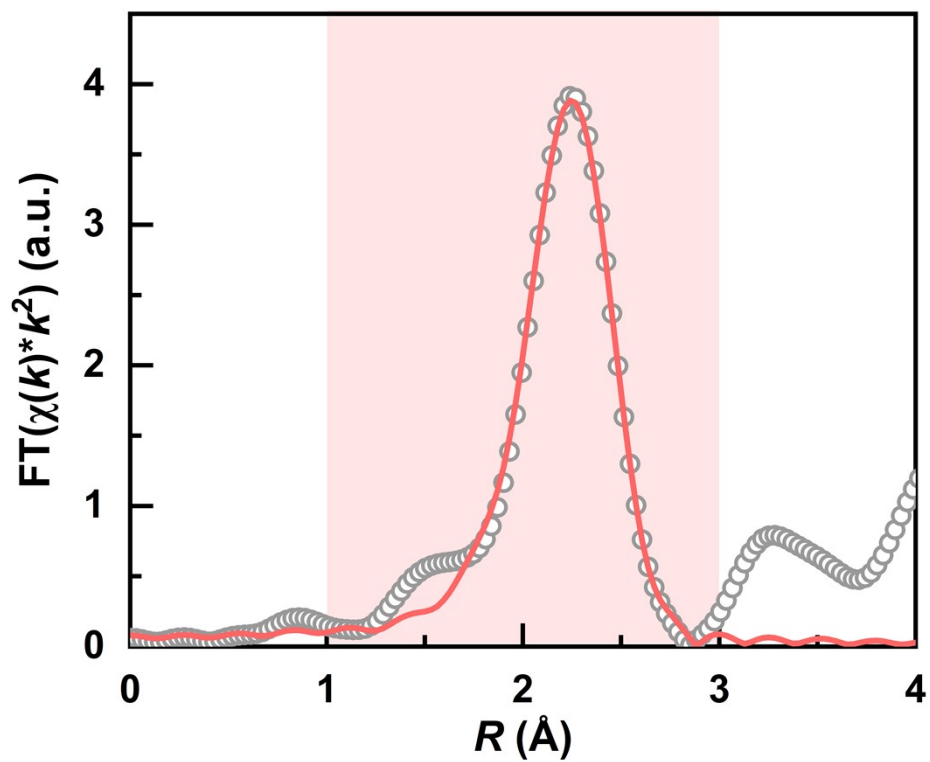

**Figure S9.** Fourier transforms of the experimental and fitted EXAFS spectra of Cu foil at Cu K-edge.

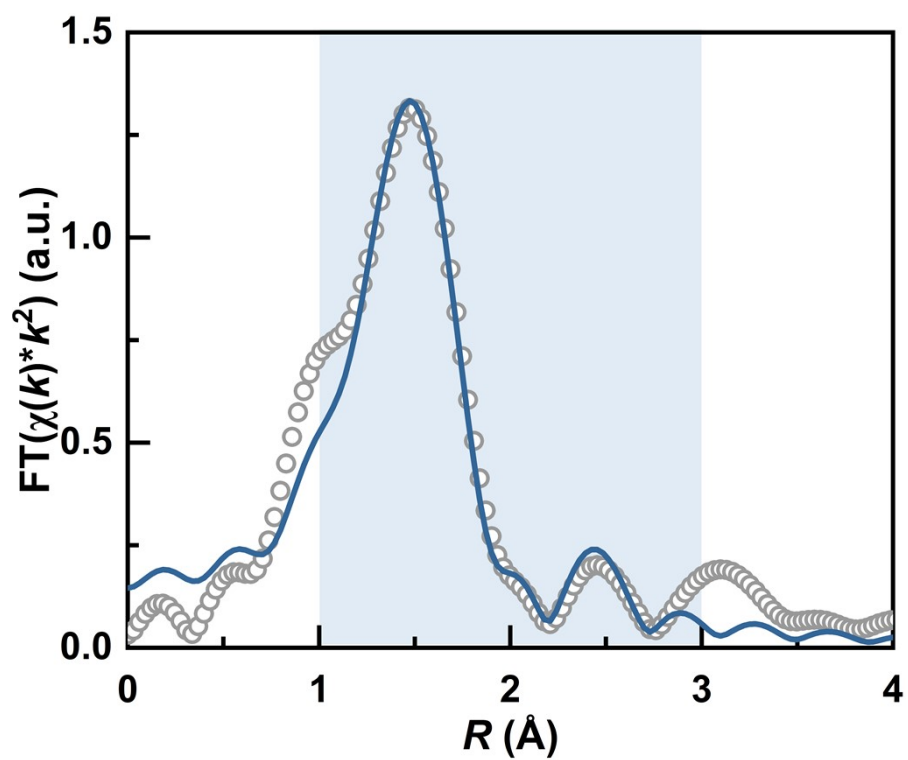

**Figure S10.** Fourier transforms of the experimental and fitted EXAFS spectra of the Cu/ZrO<sub>2</sub> catalyst at Cu K-edge.

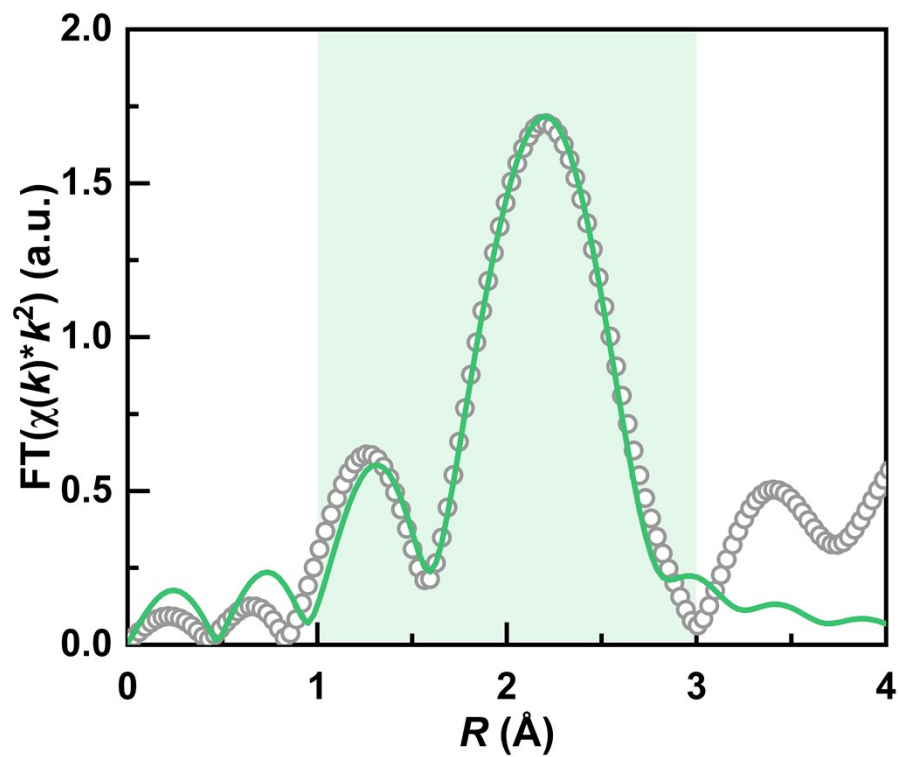

**Figure S11.** Fourier transforms of the experimental and fitted EXAFS spectra of the Cu/ZnO catalyst at Cu K-edge.

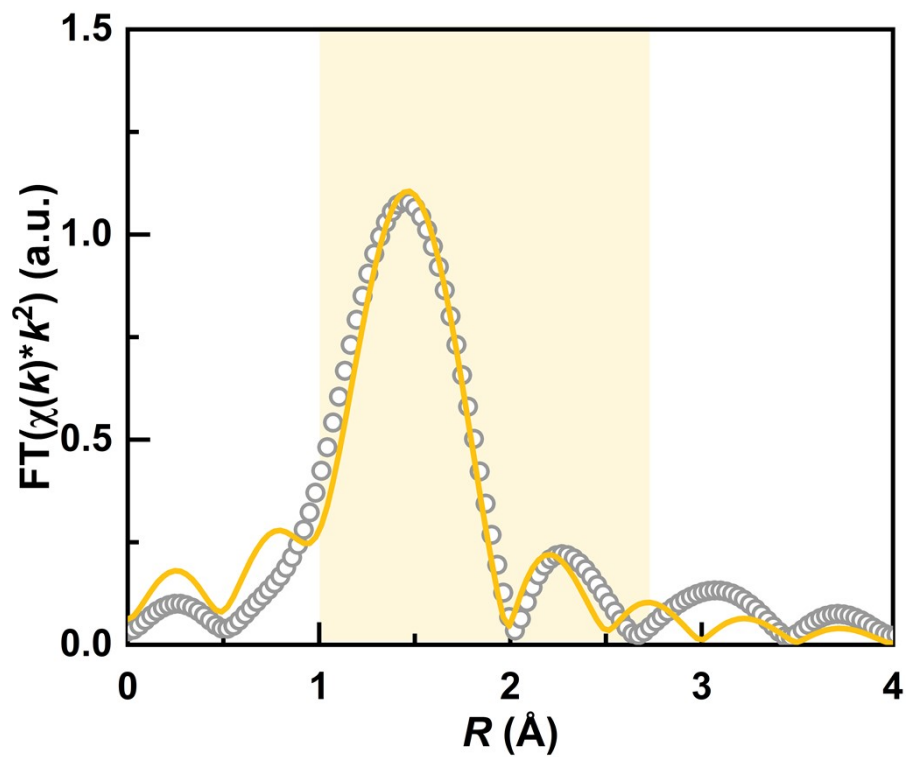

**Figure S12.** Fourier transforms of the experimental and fitted EXAFS spectra of the Cu/Al<sub>2</sub>O<sub>3</sub> catalyst at Cu K-edge.

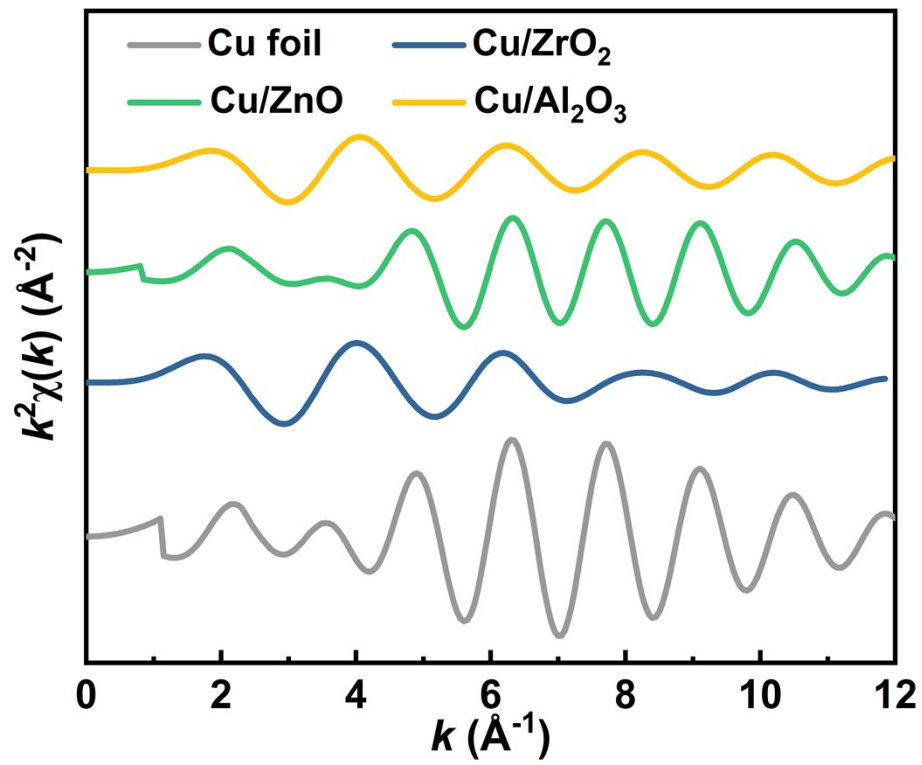

**Figure S13.** The EXAFS oscillation functions at the Cu K-edge of Cu foil, Cu/ZrO<sub>2</sub>, Cu/ZnO, and Cu/Al<sub>2</sub>O<sub>3</sub> catalysts.



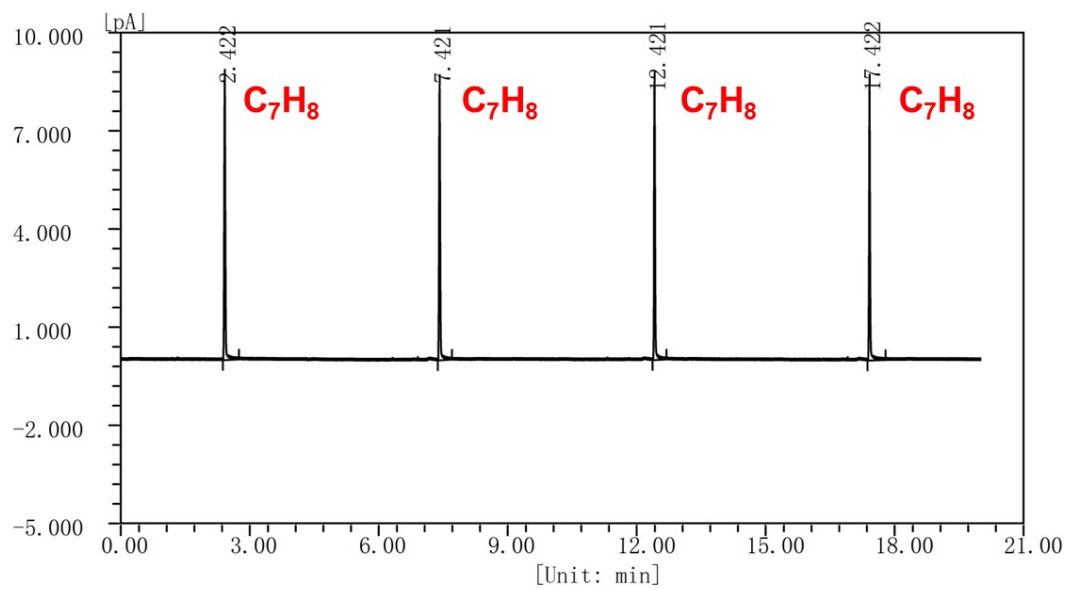

**Figure S14.** FID spectrogram analysis of toluene oxidation.

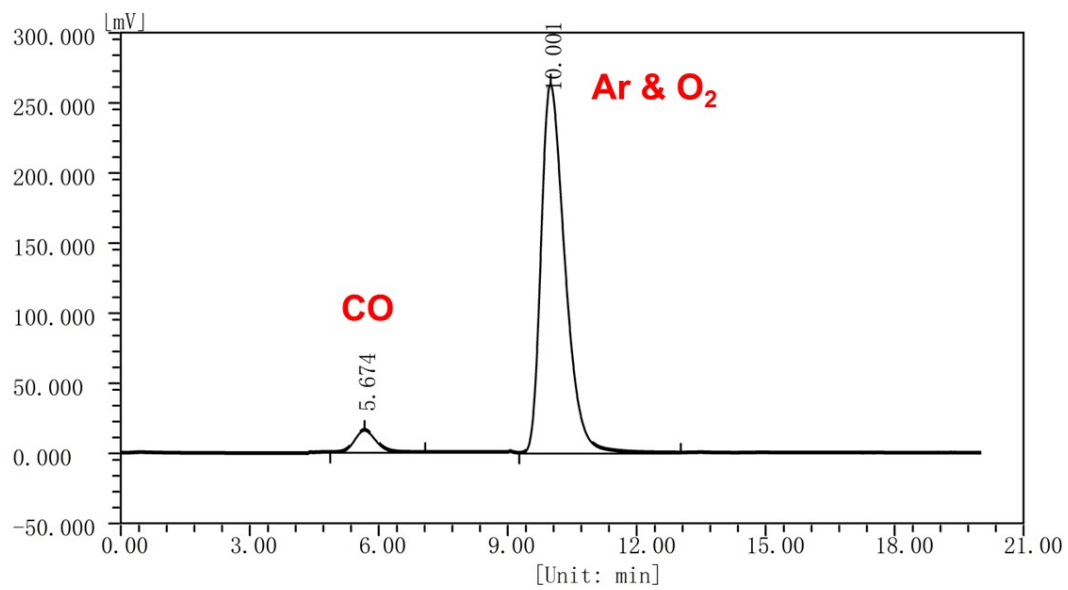

**Figure S15.** TCD spectrogram analysis of toluene oxidation.

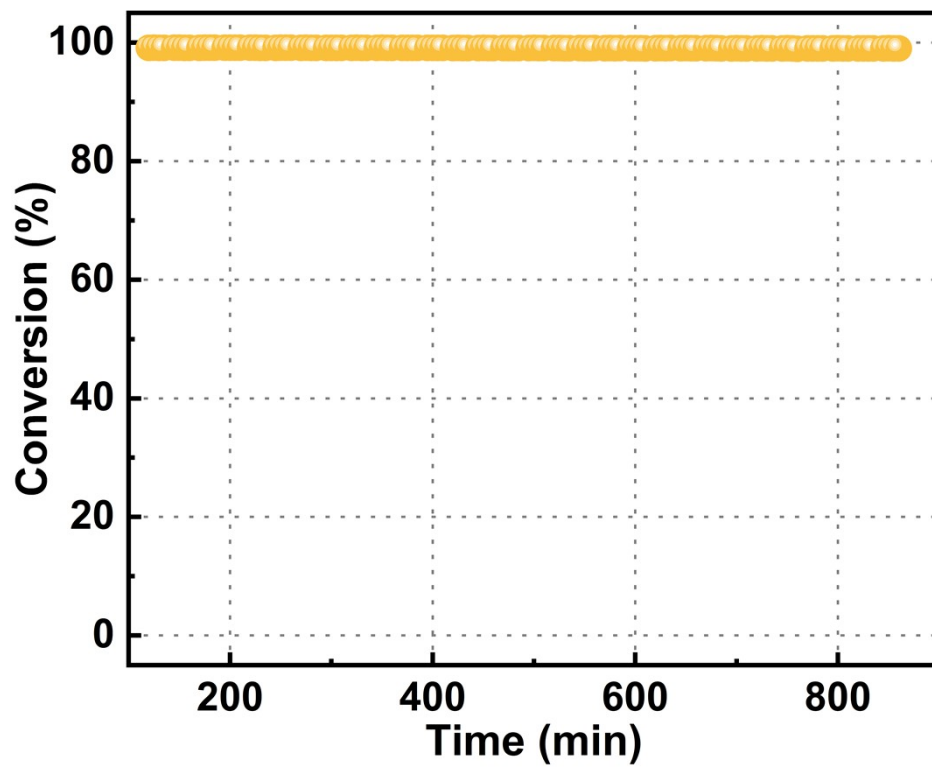

**Figure S16.** Toluene conversion as a function of reaction time over the Cu/ZrO<sub>2</sub> catalyst at 300 °C.
